# Supplementary material
Source: PubMed Central journal article supplement (PMC9575531)

## Online Supplemental Data

**Supplemental Table 1:**

**Refined Neuroimaging Criteria to differentiate Dandy-Walker Malformation, inferior vermian hypoplasia, vermian hypoplasia, Blake's pouch cyst, and vermian hypoplasia with Blake's pouch cyst**

| Diagnosis                                                  | Vermis | TVA       | Fastigial recess | Tail sign | TTC/CP     |
|------------------------------------------------------------|--------|-----------|------------------|-----------|------------|
| <b>Dandy Walker Malformation (DWM)</b>                     | IVH    | Increased | Obtuse           | Present   | Down & Out |
| <b>Inferior Vermian Hypoplasia (IVH)</b>                   | IVH    | Normal    | Acute            | Absent    | Up & In    |
| <b>Vermian Hypoplasia (VH)</b>                             | DVH    | Normal    | Acute            | Absent    | Up & In    |
| <b>Blake's Pouch Cyst (BPC)</b>                            | Normal | Increased | Acute*           | Absent*   | Up & In*   |
| <b>Vermian Hypoplasia + _Blake's Pouch Cyst (VH + BPC)</b> | VH     | Increased | Acute*           | Absent*   | Up & In*   |

DVH=diffuse vermian hypoplasia (not inferiorly predominant), Down=inferiorly displaced, In=medially directed, Out=laterally displaced, TTC/CP=taenia-tela choroidea complex/choroid plexus location, TVA=tegmentovermian angle, Up=cranially directed, \*most common but can be variable on fetal MRI.

**Supplemental Table 2: Traditional versus Refined Neuroimaging Criteria for the diagnosis of DWM**

| Diagnostic Criteria | Vermis | TVA       | Fastigial recess | Tail sign | TTC/CP     | Posterior Fossa | Torcular |
|---------------------|--------|-----------|------------------|-----------|------------|-----------------|----------|
| <b>Traditional</b>  | VH     | Increased | NA               | NA        | NA         | Enlarged        | Elevated |
| <b>Refined</b>      | IVH    | Increased | Obtuse           | Present   | Down & Out | Variable        | Variable |

Down=inferiorly displaced, IVH=inferior vermian hypoplasia, Out=laterally displaced, TTC/CP=taenia-tela choroidea complex/choroid plexus location, TVA=tegmentovermian angle, VH=vermian hypoplasia

**Supplemental Table 3: Fetal and Postnatal Brain MRI variables differentiating DWM from non-DWM**

|                                | Prenatal (n=174)  | Postnatal (n=272) |
|--------------------------------|-------------------|-------------------|
| Vermian Height                 | p=0.235           | <b>p&lt;0.001</b> |
| Vermian AP Dimension           | <b>p=0.004</b>    | <b>p&lt;0.001</b> |
| Vermian Lobule Number          | <b>p&lt;0.001</b> | <b>p&lt;0.001</b> |
| Vermian Ratio                  | <b>p&lt;0.001</b> | <b>p&lt;0.001</b> |
| Fastigial Angle                | <b>p&lt;0.001</b> | <b>p&lt;0.001</b> |
| Cisterna Magna Depth           | <b>p&lt;0.001</b> | <b>p&lt;0.001</b> |
| Tegmentovermian Angle          | <b>p&lt;0.001</b> | <b>p&lt;0.001</b> |
| Superior Posterior Fossa Angle | p=0.092           | <b>p&lt;0.001</b> |
| Posterior Fossa Perimeter      | p=0.799           | p=0.817           |
| Vascular Injury Evidence       | p=0.89            | p=0.31            |

**Supplemental Figure 1:**

**Vermian Ratio.** Vermian ratio shown on sagittal midline fetal MRI T2WI (a) and postnatal MRI T1WI (b). Vermian ratio is considered abnormal when the collective size of the posterior and central lobes was less than approximately twice the size of the anterior lobe using a line drawn from the fastigial point to the primary fissure

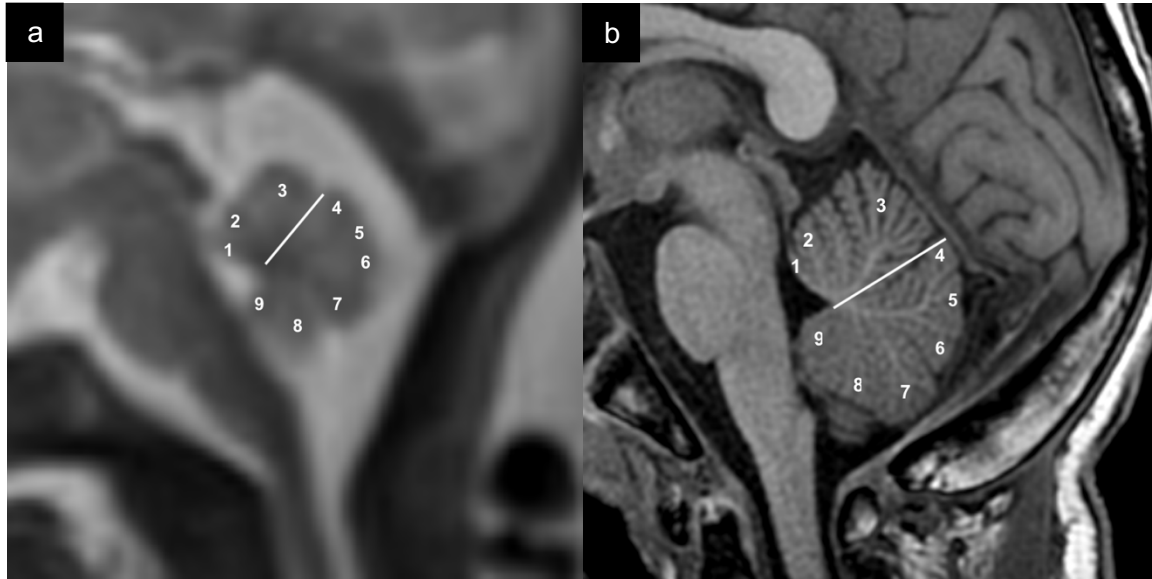

**Supplemental Figure 2:**

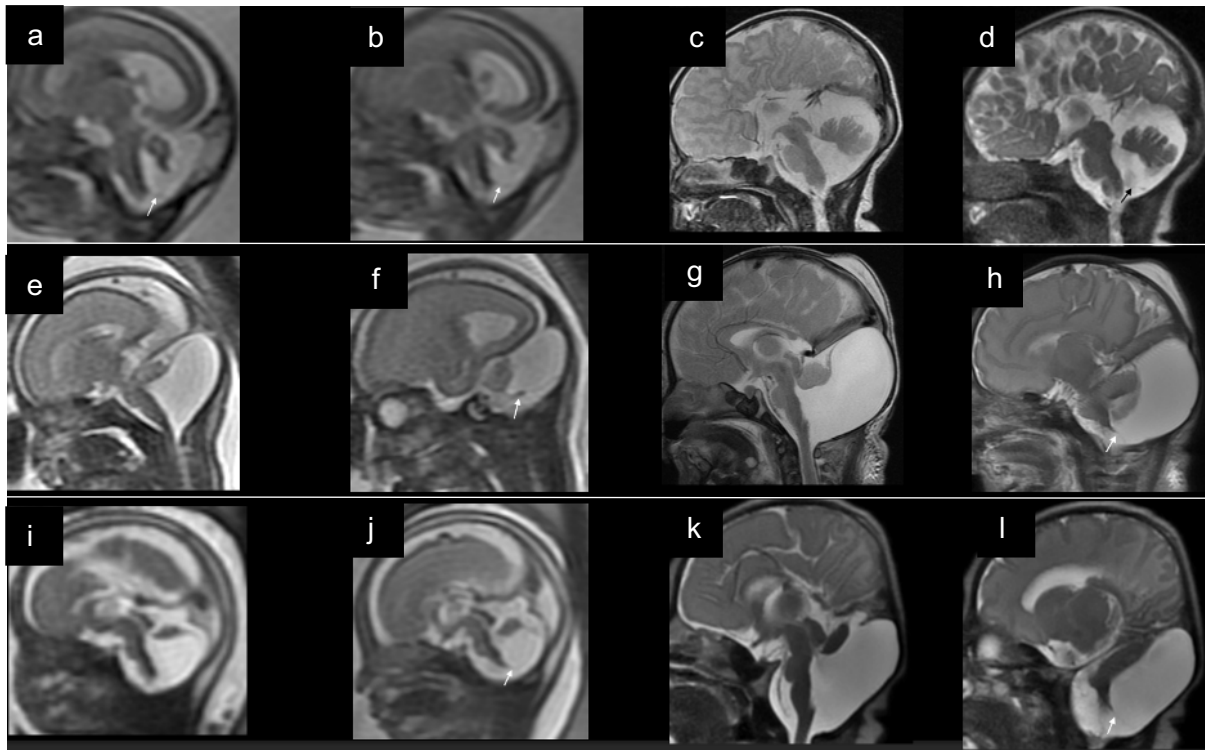

Dandy-Walker malformation: phenotypic range on sagittal T2WI with vermian deficiency/dysgenesis ranging from mild [fetal MRI at 21 weeks GA, a and b; postnatal MRI, c and d (same patient)] to moderate [fetal MRI at 25 weeks GA, e and f; postnatal MRI, g and h (same patient)] to marked [fetal MRI at 26 weeks GA, i and j; postnatal MRI, k and l (same patient)] and variably sized posterior fossae and tegmento-vermian angles. TTC and CP are displaced inferolaterally (arrows) and the fastigial angle is variably obtuse in all cases. The tail-sign is only useful when it can be confirmed to represent an unpaired caudal lobule, in which case it is virtually diagnostic; however, the tail-sign may be absent in DWM in some cases (e.g. suboptimal resolution, motion artifact, compression) and present in BPC and BPC + VH on fetal MRI when caused by ectopic location of the choroid plexus and/or rhombic lip. Concurrent corpus callosum abnormalities include agenesis (c and d) and hypogenesis (k and l).

**Supplemental Figure 3:**

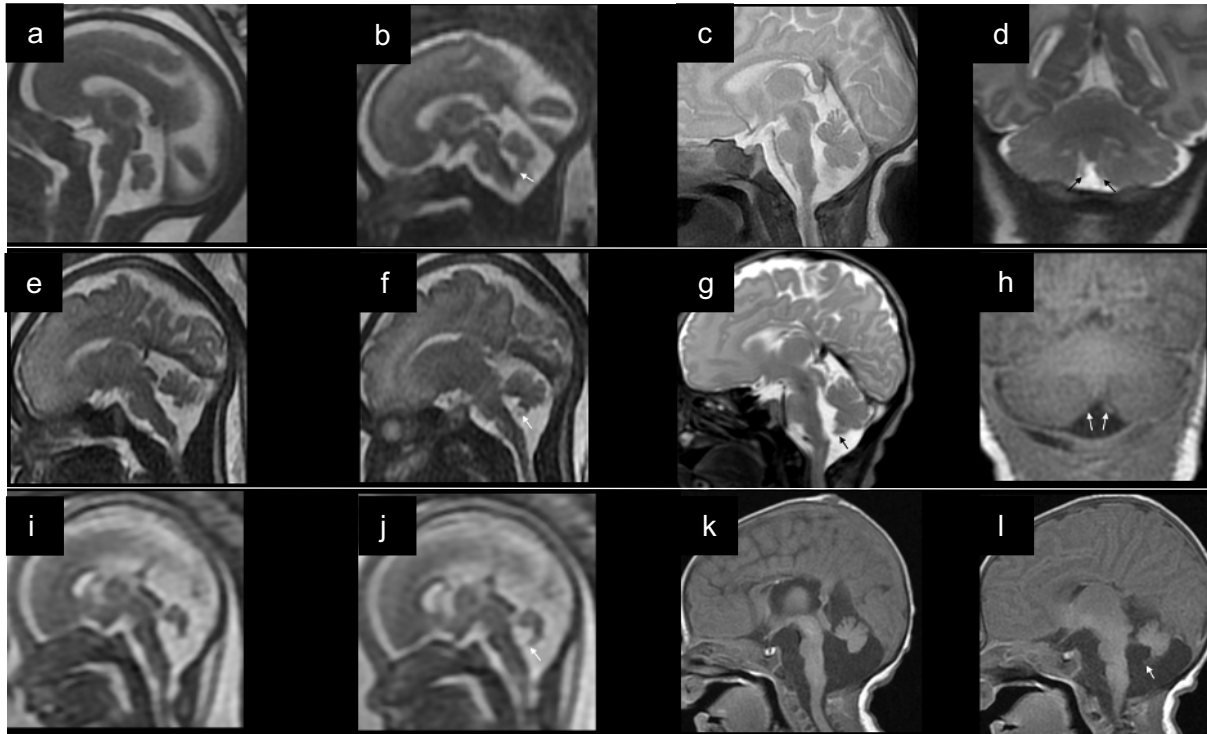

Non-DWM posterior fossa abnormalities on T1WI and T2WI. Blake's pouch cyst [fetal MRI at 28 weeks GA, a and b; postnatal MRI, c and d (same patient)]: the tegmentovermian angle is elevated at 20 degrees (a and c); however, the vermis is otherwise structurally normal - the fastigial recess is sharp, and the taenia-tela choroidea complex and choroid plexus are normally located, extending superomedially along the inferomedial cerebellar undersurface (arrows). Vermian hypoplasia [fetal MRI at 39 weeks GA, e and f; postnatal MRI, g and h (same patient)]: the inferior vermis is hypoplastic with lack of the normal 2:1 posterior to anterior vermis ratio. The fastigial recess is sharp and the taenia-tela choroidea complex and choroid plexus are normally located along the inferomedial cerebellum (arrows). Vermian hypoplasia *and* Blake's pouch cyst: [fetal MRI at 18 weeks GA, i and j; postnatal MRI, k and l (same patient)]: the tegmentovermian angle is elevated, the vermis is hypoplastic, the fastigial recess is sharp, and the taenia-tela choroidea complex and choroid plexus are normally located along the inferomedial cerebellum (arrows).

## Supplemental Figure 4:

### Supplemental Figure 4a:

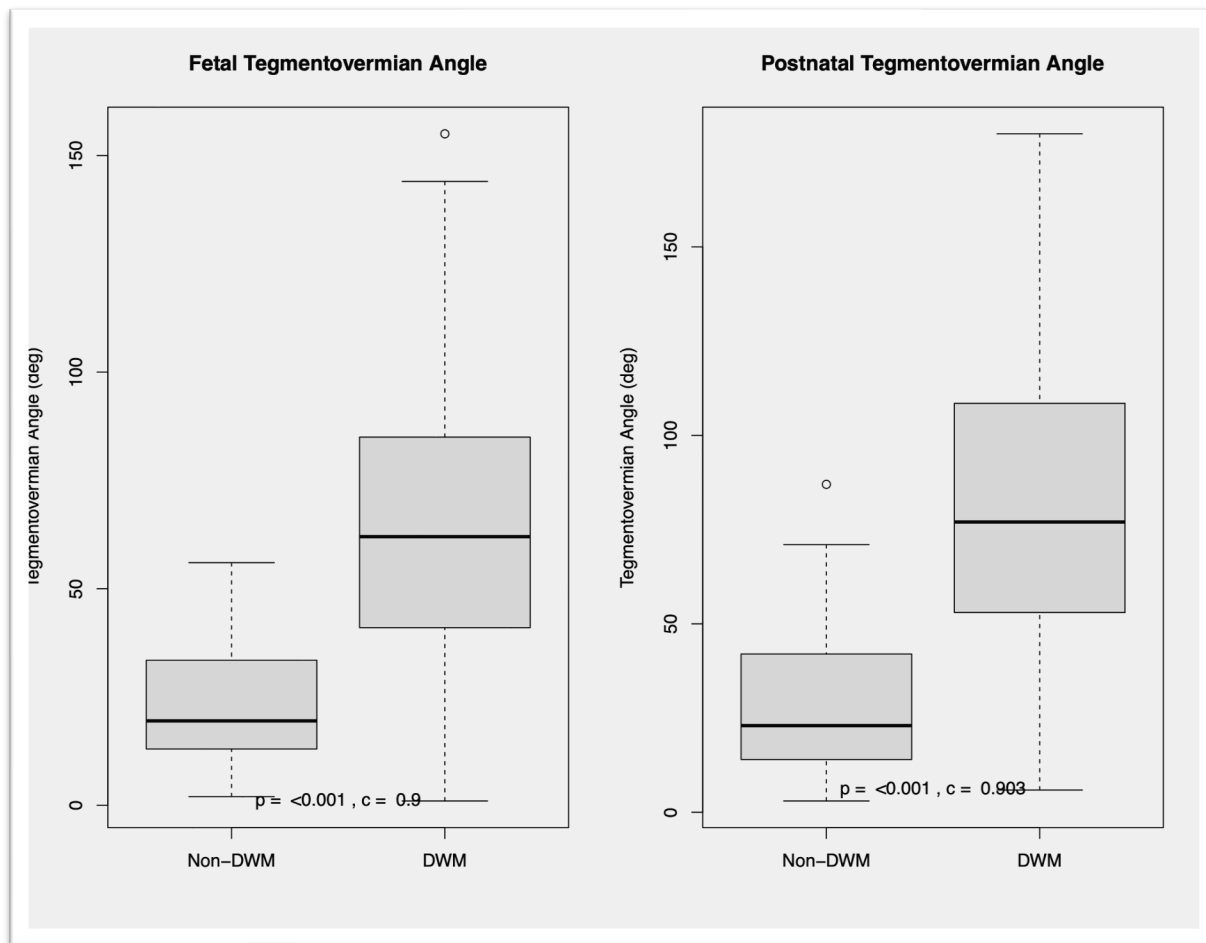

Supplemental Figure 4b:

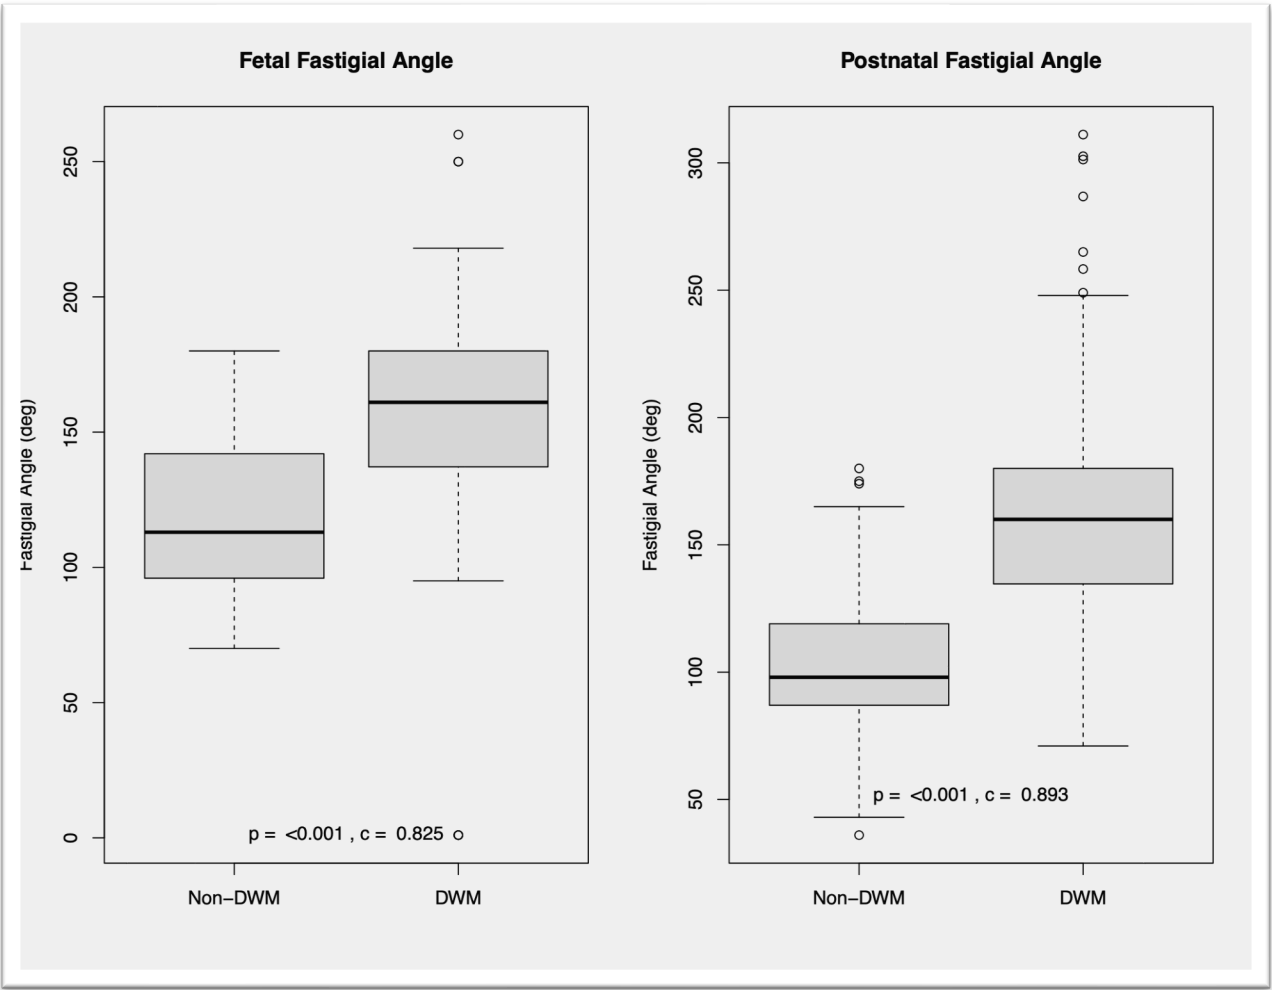

Supplemental Figure 4c:

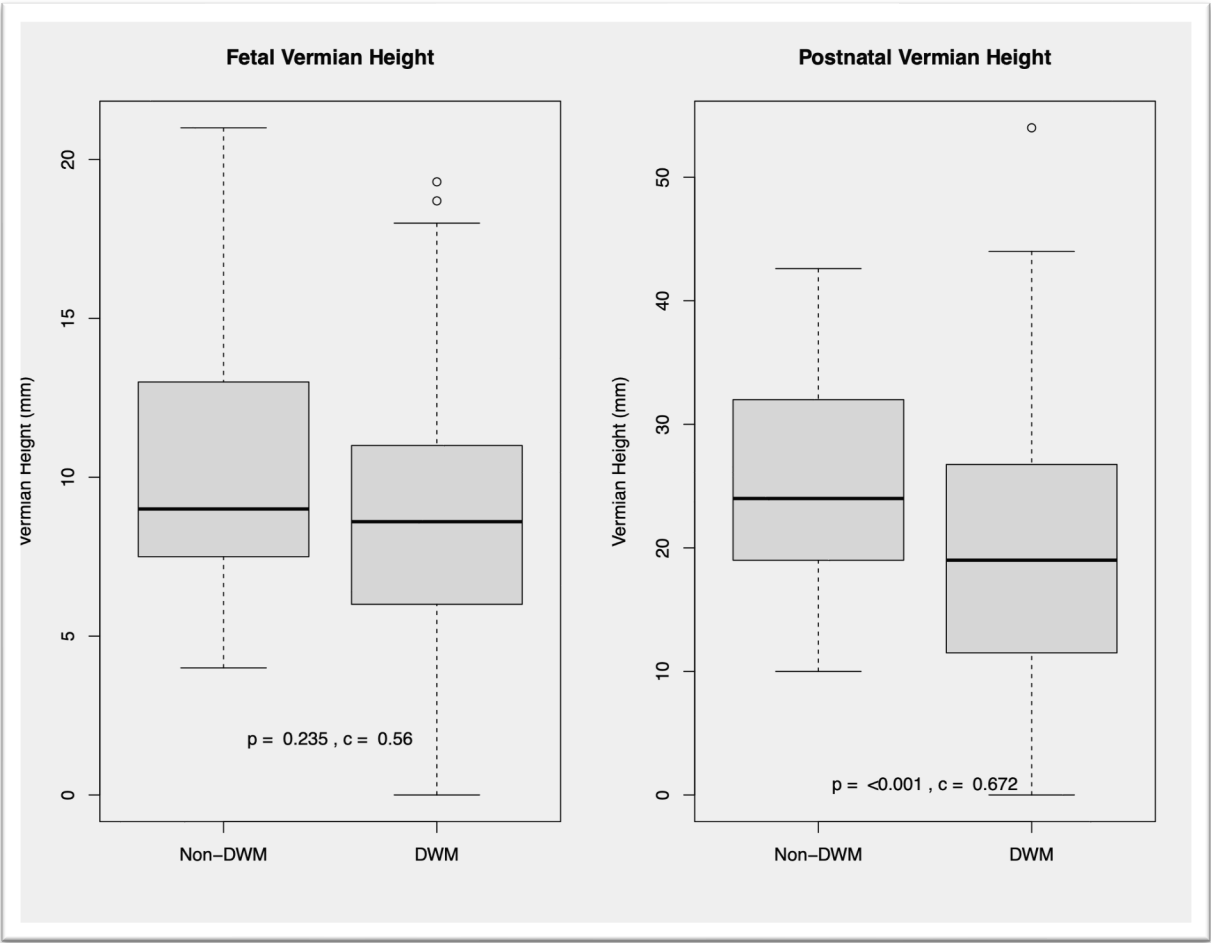

Supplemental Figure 4d:

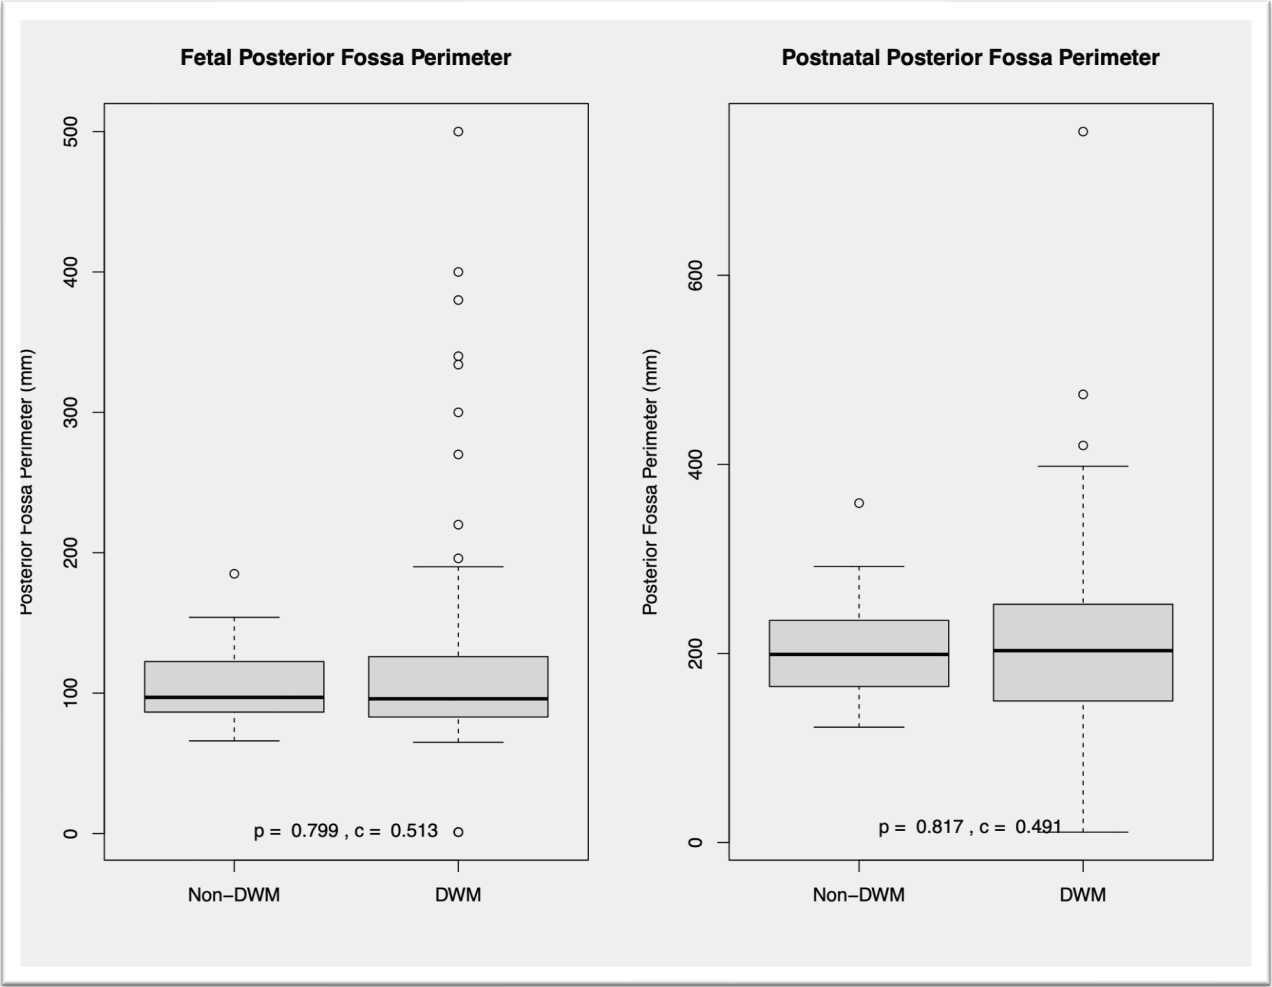

Supplemental Figure 4e:

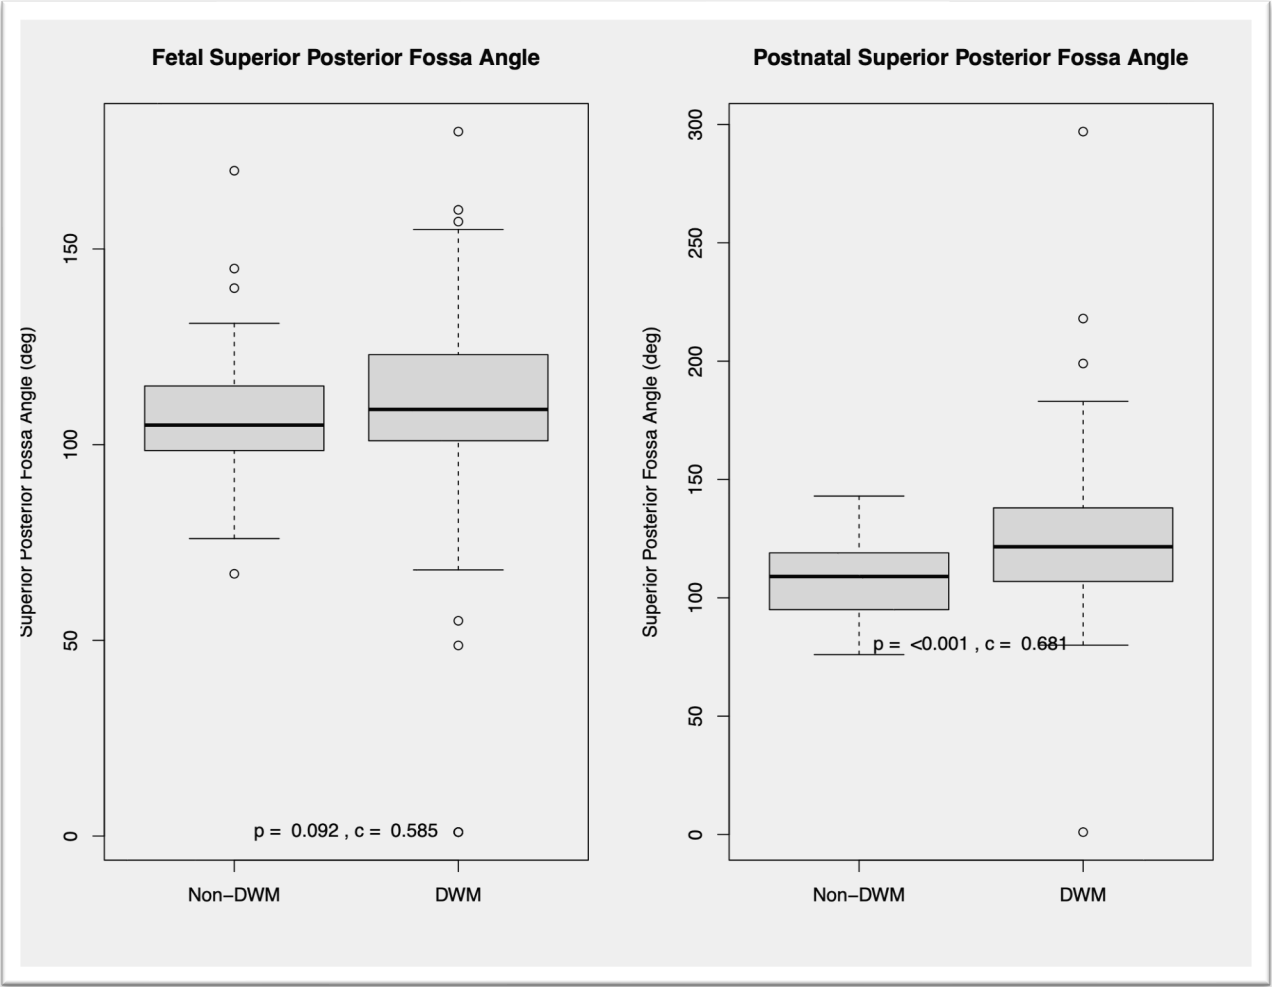

Supplemental Figure 4f:

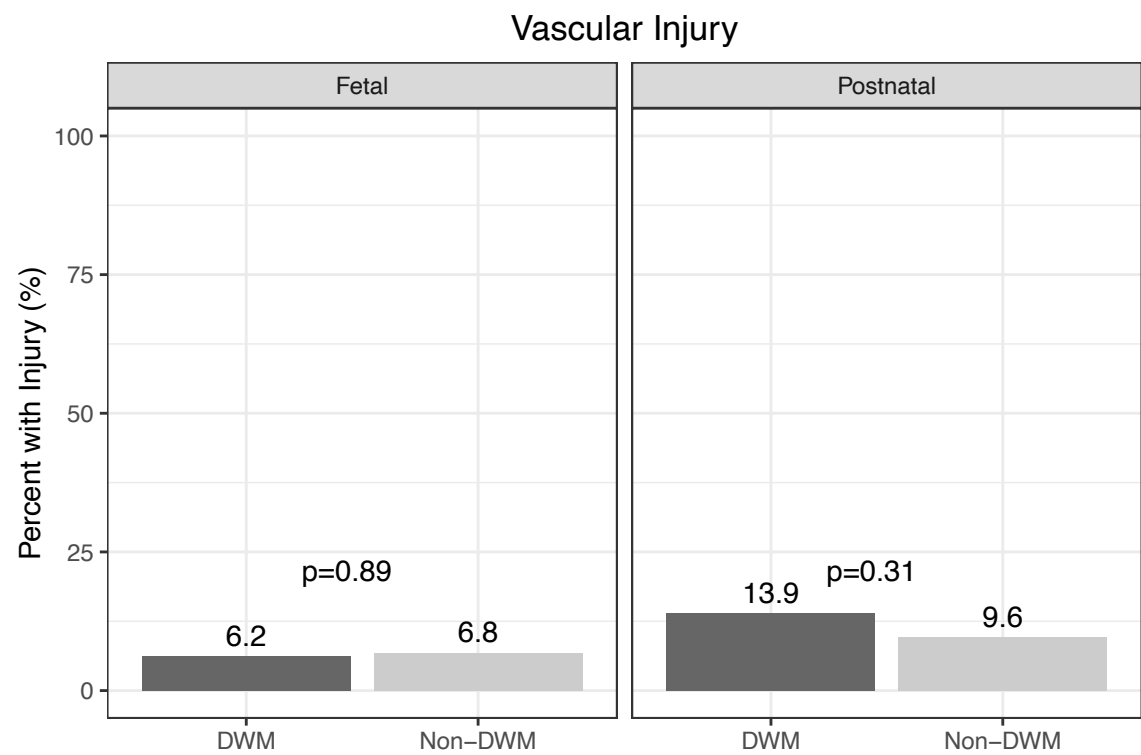

### Supplemental Figure 5

Receiver operating characteristic (ROC) curves for the differentiation of DWM from non-DWM using an optimized linear model in prenatal (A) and postnatal (B) cohorts. ROC curves a linear model incorporating age and TVA in prenatal (C) and postnatal (D) cohorts. ROC curve for differentiation of DWM and non-DWM patients using TVA alone resulting in AUC of 0.901 (E).

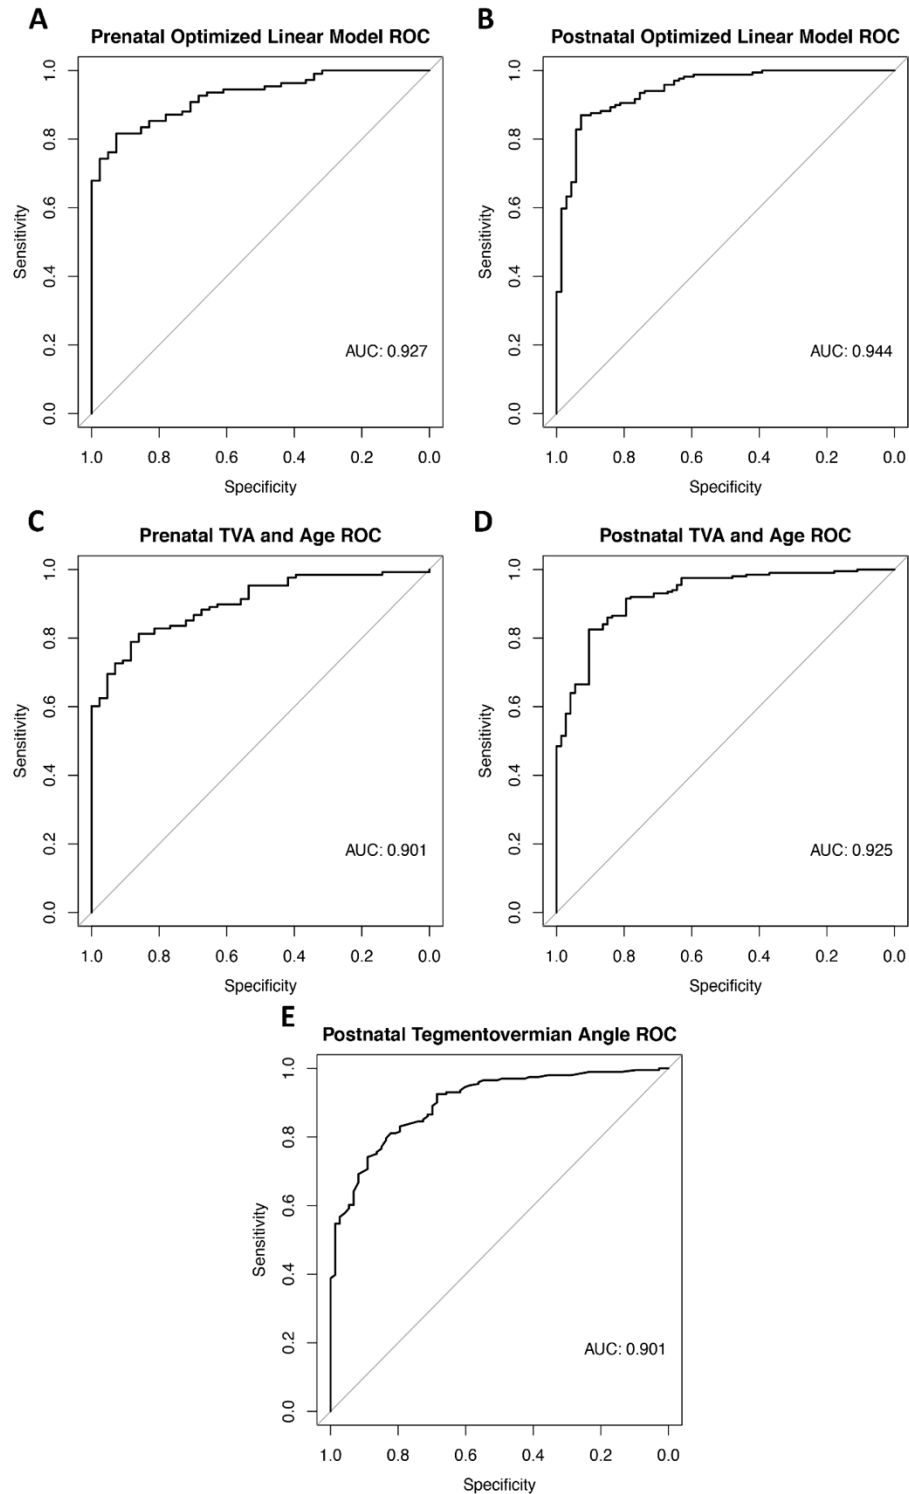

Supplement: 0354.pdf [file 0354.pdf]
